# Supplementary material for: Creating a MOF with larger pores and higher stability for gas separation through continuous structure transformation
Source: Royal Society of Chemistry journal article supplement (doi:10.1039/d4ta05318d), 2024-01-01
Supplement: d4ta05318d1.pdf [file d4ta05318d1.pdf]

## Supporting information† for

### Creating larger pores and higher stability of MOF for gas separation through continuous structure transformation

Lin Zhang<sup>1</sup>, Gang-Ding Wang<sup>1</sup>, Bin Zhang<sup>1</sup>, Guo-Ping Yang<sup>1</sup>, Wen-Yan Zhang<sup>1</sup>, Lei Hou<sup>1\*</sup>, Yao-Yu Wang<sup>1</sup>, and Zhonghua Zhu<sup>2</sup>

<sup>1</sup> Key Laboratory of Synthetic and Natural Functional Molecule of the Ministry of Education, National Demonstration Center for Experimental Chemistry Education (Northwest University), College of Chemistry & Materials Science, Northwest University, Xi'an 710069, P. R. China <sup>2</sup> School of Chemical Engineering, The University of Queensland, Brisbane 4072, Australia

\*Corresponding Author: lhou2009@nwu.edu.cn

## Content

|                                                                                                                                                                          |    |
|--------------------------------------------------------------------------------------------------------------------------------------------------------------------------|----|
| 1. Comparison with the method of manufacturing defect/vacancy in the literature .....                                                                                    | 1  |
| 2. Material synthesis .....                                                                                                                                              | 2  |
| (1) Synthesis of $[\text{Zn}_6(\text{OATA})_3(\text{H}_2\text{O})_4(\text{DMF})_2] \cdot 5\text{H}_2\text{O} \cdot 10\text{DMF}$ (Zn-OATA).....                          | 2  |
| (2) Synthesis of $[\text{Zn}_6(\text{OATA})_3\text{Bipy}_2(\text{H}_2\text{O})_2] \cdot 4\text{H}_2\text{O} \cdot 5\text{DMF}$ (Zn-OATA-Bipy) .....                      | 2  |
| (3) Synthesis of $[\text{Zn}_{5.1}\text{Cu}_{0.9}(\text{OATA})_3\text{Bipy}_2(\text{H}_2\text{O})_2] \cdot 4\text{H}_2\text{O} \cdot 4\text{DMF}$ (ZnCu-OATA-Bipy) ..... | 3  |
| (4) Synthesis of $[\text{Cu}_2(\text{OATA})(\text{H}_2\text{O})_2] \cdot 2\text{H}_2\text{O} \cdot 4\text{DMF}$ (Cu-OATA) .....                                          | 3  |
| 3. Scanning electron microscope (SEM) .....                                                                                                                              | 4  |
| 4. X-ray crystallographic measurements.....                                                                                                                              | 4  |
| 5. Powder X-ray diffraction (PXRD) and thermogravimetric analysis (TGA) .....                                                                                            | 6  |
| 6. Calculation of sorption heat using Virial 2 model .....                                                                                                               | 7  |
| 7. IAST adsorption selectivity calculation.....                                                                                                                          | 9  |
| 8. Grand canonical Monte Carlo (GCMC) simulations .....                                                                                                                  | 13 |
| 9. Breakthrough experiments .....                                                                                                                                        | 13 |
| 10. References.....                                                                                                                                                      | 15 |

# 1. Comparison with the method of manufacturing defect/vacancy in the literature

**Table S1.** Comparisons between this work and similar literature.

| Category         | Methods                                                                                   | Results                                                                                                                                                                                                                                                                                                                                                                        | Location selectivity of defect                | Proving the structures by single crystal tests  | Ref.                                          |
|------------------|-------------------------------------------------------------------------------------------|--------------------------------------------------------------------------------------------------------------------------------------------------------------------------------------------------------------------------------------------------------------------------------------------------------------------------------------------------------------------------------|-----------------------------------------------|-------------------------------------------------|-----------------------------------------------|
| Before synthesis | Introducing missing-linker defects                                                        | Forming unsaturated metal center, but the defect concentration is limited.                                                                                                                                                                                                                                                                                                     | No                                            | No                                              | <i>J. Am. Chem. Soc.</i> 2016, 138, 6636-6642 |
| In synthesis     | Perturbation-assisted synthesis                                                           | Hindering crystal growth, resulting in random defects, which will lead to partial amorphization.                                                                                                                                                                                                                                                                               |                                               |                                                 | <i>J. Am. Chem. Soc.</i> 2013, 135, 9572-9575 |
|                  | Template-oriented synthesis                                                               | Random defects occur, and the removal of the template may cause the skeleton to collapse.                                                                                                                                                                                                                                                                                      |                                               |                                                 | <i>Nat. Commun.</i> 2015, 6, 8847             |
| Post synthesis   | Introducing terminal ligands for substitution                                             | Some of the original ligands fall off, forming random defects.                                                                                                                                                                                                                                                                                                                 |                                               |                                                 | Little (no position selectivity)              |
|                  | Introducing unstable linker                                                               | The ligands break after heating and form random defects.                                                                                                                                                                                                                                                                                                                       | <i>Nat. Commun.</i> 2017, 8, 15356            |                                                 |                                               |
|                  | Introducing specific ligands with poor thermal stability                                  | The specific ligands coordinate randomly and fall off after being heated to produce defects.                                                                                                                                                                                                                                                                                   | <i>J. Am. Chem. Soc.</i> 2018, 140, 2363-2372 |                                                 |                                               |
|                  | Using less stability Zn-O for hydrolysis                                                  | The ligands and metals fall off together, and one metal ion and one ligand in the cluster were removed.                                                                                                                                                                                                                                                                        | Partial (no linker selectivity)               | <i>J. Am. Chem. Soc.</i> 2014, 136, 14465-14471 |                                               |
|                  | Introducing Cu <sup>2+</sup> ions with shorter M-N bonds to replace Zn <sup>2+</sup> ions | <ol style="list-style-type: none"> <li>1. It becomes a more active Cu<sub>2</sub>(COO)<sub>4</sub> SBU, and the adsorption performance is enhanced.</li> <li>2. The Cu<sub>2</sub>(COO)<sub>4</sub> paddle wheel SBU shrinks and the connecting ligand falls off.</li> <li>3. The lengths of coordination bond become shorter and the stability of MOF is enhanced.</li> </ol> | <b>Complete selectivity</b>                   | <b>This Work</b>                                |                                               |

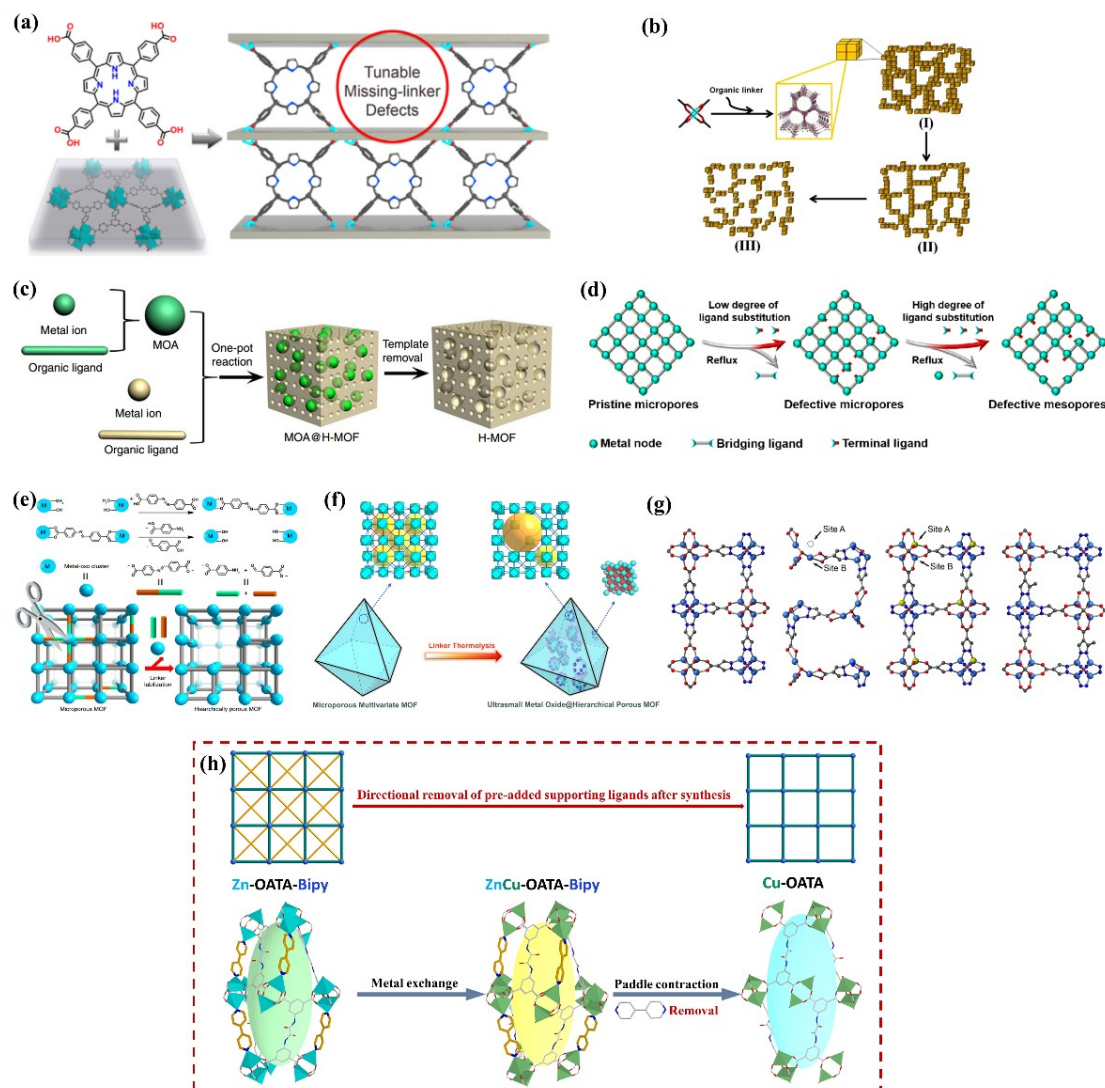

**Figure S1.** Schematic diagram in references (a-g) and this work (h), showing difference in methods and results.

## 2. Material synthesis

5,5'-(oxalylbis(azanediyl))diisophthalic acid ( $H_4OATA$ ) was synthesized by literature methods.<sup>[1]</sup> The drugs used (5-aminoisophthalic acid, 98% and oxalyl chloride, 98%) were purchased from Energy Chemical.

### (1) Synthesis of $[Zn_6(OATA)_3(H_2O)_4(DMF)_2] \cdot 5H_2O \cdot 10DMF$ (Zn-OATA)<sup>[1]</sup>

$Zn(NO_3)_2 \cdot 6H_2O$  (0.12 g, 0.40 mmol) and  $H_4OATA$  (0.03 g, 0.07 mmol) were mixed in 6 mL of DMF at room temperature under stirring for 20 min. The solution was sealed in a glass bottle and heated at 85 °C for 24 h.

**(2) Synthesis of  $[\text{Zn}_6(\text{OATA})_3\text{Bipy}_2(\text{H}_2\text{O})_2]\cdot 4\text{H}_2\text{O}\cdot 5\text{DMF}$  (**Zn-OATA-Bipy**)**

$\text{Zn}(\text{NO}_3)_2\cdot 6\text{H}_2\text{O}$  (0.0297 g, 0.10 mmol),  $\text{H}_4\text{OATA}$  (0.0412 g, 0.10 mmol), 4,4'-Bipyridine (Bipy) (0.0078 g, 0.05 mmol), N,N-Dimethylformamide (DMF, 5 mL), and concentrated  $\text{HNO}_3$  (65%, 100  $\mu\text{L}$ ) was stirred and dissolved in glass bottles, heated at 105 °C for 72 h, and the yellowish block crystals of **Zn-OATA-Bipy** were obtained after cooling (yield:73%). Anal. Calcd for  $\text{C}_{89}\text{H}_{87}\text{Zn}_6\text{O}_{41}\text{N}_{15}$ : C, 44.30; H, 3.61; N, 8.71%. Found: C, 44.62; H, 3.48; N, 8.89%.

**(3) Synthesis of  $[\text{Zn}_{5.1}\text{Cu}_{0.9}(\text{OATA})_3\text{Bipy}_2(\text{H}_2\text{O})_2]\cdot 4\text{H}_2\text{O}\cdot 4\text{DMF}$  (**ZnCu-OATA-Bipy**)**

The crystal of **Zn-OATA-Bipy** (200 mg) was immersed in the solution of 5 mL 0.5 M  $\text{Cu}(\text{NO}_3)_2\cdot 2.5\text{H}_2\text{O}$  dissolved by DMF and heated at 85°C for 8-12 hours, then the bright green crystal fragments of **ZnCu-OATA-Bipy** was obtained. Anal. Calcd for  $\text{C}_{86}\text{H}_{80}\text{Cu}_6\text{O}_{40}\text{N}_{14}$ : C, 43.14; H, 3.34; N, 8.19%. Found: C, 43.56; H, 3.52; N, 8.03%.

**(4) Synthesis of  $[\text{Cu}_2(\text{OATA})(\text{H}_2\text{O})_2]\cdot 2\text{H}_2\text{O}\cdot 4\text{DMF}$  (**Cu-OATA**)**

The crystal of **Zn-OATA-Bipy** (200 mg) was immersed in the solution of 5 mL 0.5 M  $\text{Cu}(\text{NO}_3)_2\cdot 2.5\text{H}_2\text{O}$  dissolved by DMF and heated at 105°C for 24 hours, then the dark green crystal fragments of **Cu-OATA** was obtained (yield:96%). Anal. Calcd for  $\text{C}_{30}\text{H}_{44}\text{Cu}_2\text{O}_{18}\text{N}_6$ : C, 39.82; H, 4.87; N, 9.29%. Found: C, 44.91; H, 5.02; N, 8.19%.

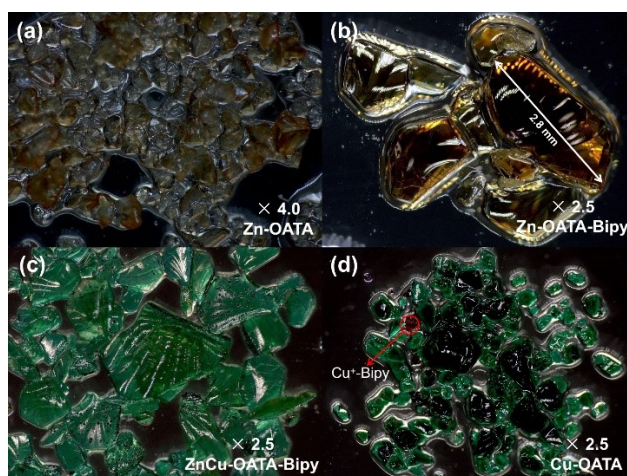

**Figure S2.** The crystal appearance of (a) Zn-OATA, (b) Zn-OATA-Bipy, (c) ZnCu-OATA-Bipy, and (d) Cu-OATA under the microscope.

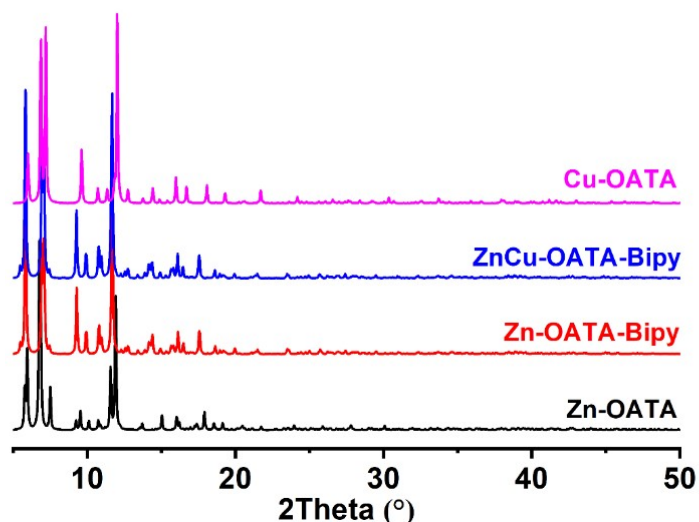

Figure S3. PXRD patterns of four MOFs.

### 3. Scanning electron microscope (SEM)

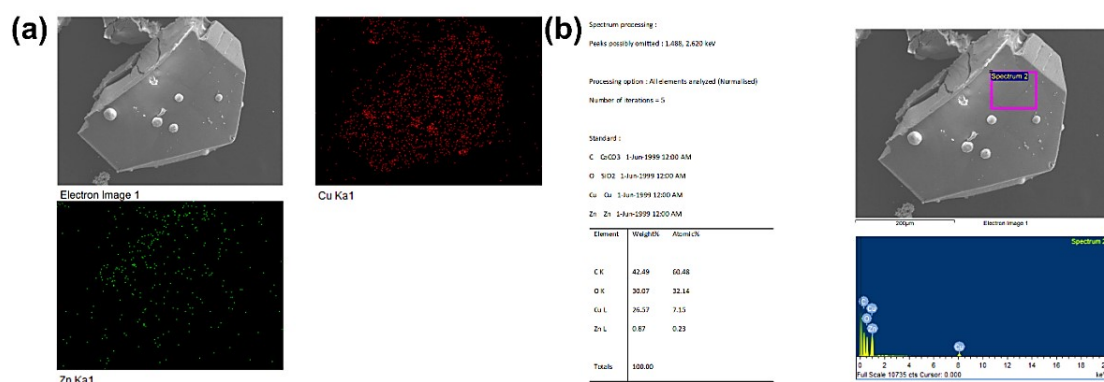

Figure S4. Mapping (a) and EDS (b) analysis of ZnCu-OATA-Bipy.

### 4. X-ray crystallographic measurements

The single crystal diffraction data was conducted at 200(2) K on a Bruker SMART APEX II CCD detector diffractometer. The structure was solved by direct method and refined on  $F^2$  by full-matrix least-squares procedures with SHELXL-2014 software package. The non-hydrogen atoms were refined anisotropically, while the hydrogen atoms added to their geometrically ideal positions and were refined isotropically. For the disordered lattice molecules that cannot be well refined, the SQUEEZE procedure was adopted in structural refinement. The results of structure refinement are listed in Tables S1.

**Table S2.** Crystallographic data of five MOFs.

|                                                                                 | Zn-OATA <sup>[1]</sup>                                                         | Zn-OATA-Bipy                                                                    | ZnCu-OATA-Bipy                                                                                      | Cu-OATA                                                                        | Cu <sup>+</sup> -Bipy                                          |
|---------------------------------------------------------------------------------|--------------------------------------------------------------------------------|---------------------------------------------------------------------------------|-----------------------------------------------------------------------------------------------------|--------------------------------------------------------------------------------|----------------------------------------------------------------|
| Empirical formula                                                               | C <sub>30</sub> H <sub>23</sub> Zn <sub>3</sub> N <sub>4</sub> O <sub>18</sub> | C <sub>74</sub> H <sub>44</sub> Zn <sub>6</sub> N <sub>10</sub> O <sub>32</sub> | C <sub>74</sub> H <sub>44</sub> Cu <sub>0.9</sub> N <sub>10</sub> O <sub>32</sub> Zn <sub>5.1</sub> | C <sub>18</sub> H <sub>12</sub> Cu <sub>2</sub> N <sub>2</sub> O <sub>12</sub> | C <sub>11</sub> H <sub>9</sub> CuN <sub>2</sub> O <sub>2</sub> |
| Formula weight                                                                  | 923.63                                                                         | 1977.41                                                                         | 1975.76                                                                                             | 575.38                                                                         | 264.74                                                         |
| Crystal system                                                                  | Triclinic                                                                      | Monoclinic                                                                      | Monoclinic                                                                                          | Trigonal                                                                       | Orthorhombic                                                   |
| Space group                                                                     | P-1                                                                            | P2 <sub>1</sub> /c                                                              | P2 <sub>1</sub> /c                                                                                  | R-3m                                                                           | Fddd                                                           |
| <i>a</i> (Å)                                                                    | 16.6706(2)                                                                     | 27.6797(15)                                                                     | 27.7020(18)                                                                                         | 18.5090(9)                                                                     | 9.570(2)                                                       |
| <i>b</i> (Å)                                                                    | 16.6706(2)                                                                     | 19.0412(12)                                                                     | 19.0518(10)                                                                                         | 18.5090(9)                                                                     | 13.1650(16)                                                    |
| <i>c</i> (Å)                                                                    | 17.7165(2)                                                                     | 32.9249(19)                                                                     | 33.007(2)                                                                                           | 38.449(4)                                                                      | 32.976(5)                                                      |
| <i>α, β, γ</i> (°)                                                              | 65.501(3)                                                                      | 90                                                                              | 90                                                                                                  | 90                                                                             | 90                                                             |
|                                                                                 | 65.445(3)                                                                      | 112.962(2)                                                                      | 113.014(2)                                                                                          | 90                                                                             | 90                                                             |
|                                                                                 | 69.980(4)                                                                      | 90                                                                              | 90                                                                                                  | 120                                                                            | 90                                                             |
| <i>Z, V</i> (Å <sup>3</sup> )                                                   | 2, 3988.2(5)                                                                   | 4, 15978.2(16)                                                                  | 4, 16033.8(17)                                                                                      | 9, 11407.3(16)                                                                 | 16, 4154.7(12)                                                 |
| <i>D<sub>c</sub></i> (g cm <sup>-3</sup> ), <i>μ</i> (mm <sup>-1</sup> )        | 0.769, 0.93                                                                    | 0.822, 0.933                                                                    | 0.818, 0.915                                                                                        | 0.475, 4.710                                                                   | 1.693, 2.086                                                   |
| <i>R<sub>int</sub></i> , GOF                                                    | 0.263, 1.086                                                                   | 0.1190, 1.077                                                                   | 0.0519, 1.051                                                                                       | 0.2138, 1.150                                                                  | 0.0882, 1.135                                                  |
| <i>R<sub>1</sub></i> <sup>a</sup> , <i>wR<sub>2</sub></i> <sup>b</sup> [I > 2σ] | 0.173, 0.507                                                                   | 0.0866, 0.2712                                                                  | 0.0380, 0.1172                                                                                      | 0.2667, 0.2352                                                                 | 0.0788, 0.2374                                                 |

<sup>a</sup>*R*<sub>1</sub> = Σ||*F*<sub>o</sub> - |*F*<sub>c</sub>||/Σ|*F*<sub>o</sub>|; <sup>b</sup>*wR*<sub>2</sub> = [Σ*w*(*F*<sub>o</sub><sup>2</sup> - *F*<sub>c</sub><sup>2</sup>)<sup>2</sup>/Σ*w*(*F*<sub>o</sub><sup>2</sup>)<sup>2</sup>]<sup>1/2</sup>.

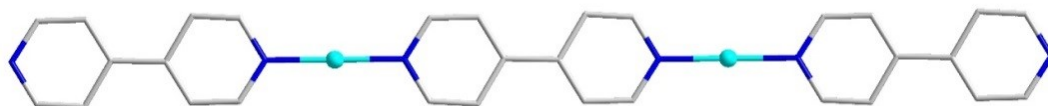**Figure S5.** Coordination structure diagram of Cu<sup>+</sup>-complex [Cu(Bipy)](HCOO).



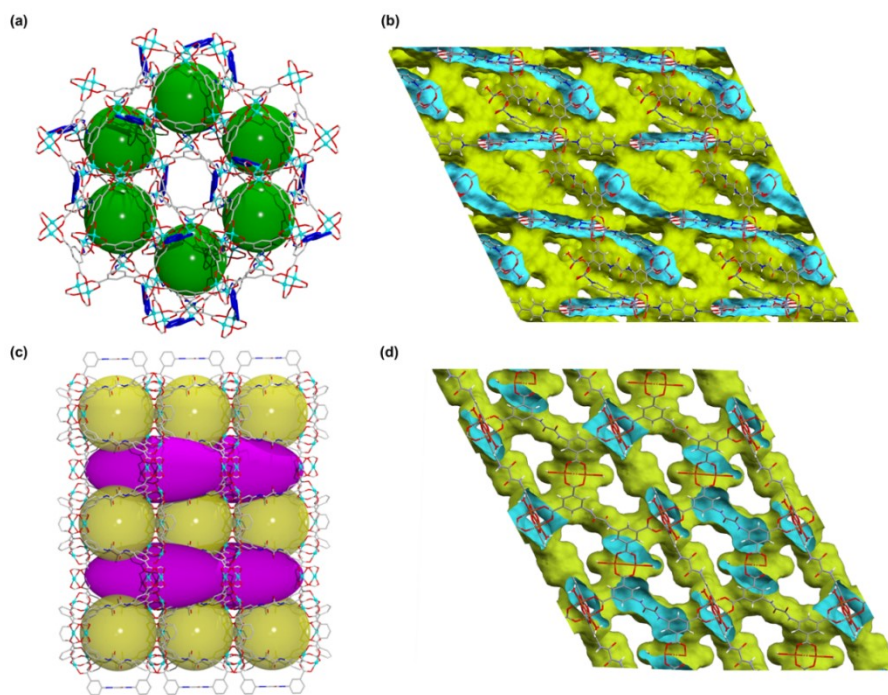

**Figure S6.** (a) and (b) 3D porous framework of Zn-OATA-Bipy; (c) and (d) 3D porous framework of Cu-OATA.

## 5. Powder X-ray diffraction (PXRD) and thermogravimetric analysis (TGA)

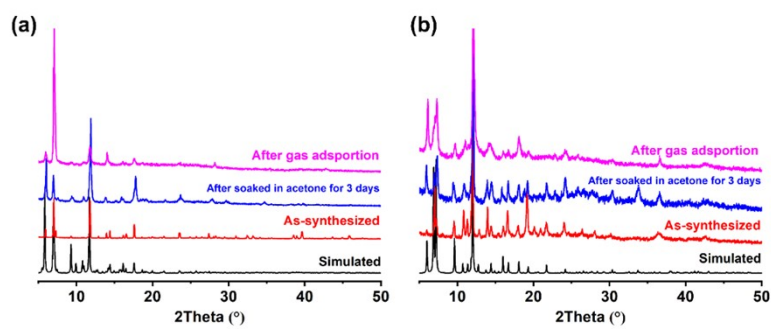

**Figure S7.** PXRD patterns of Zn-OATA-Bipy (a) and Cu-OATA (b) after different treatments.



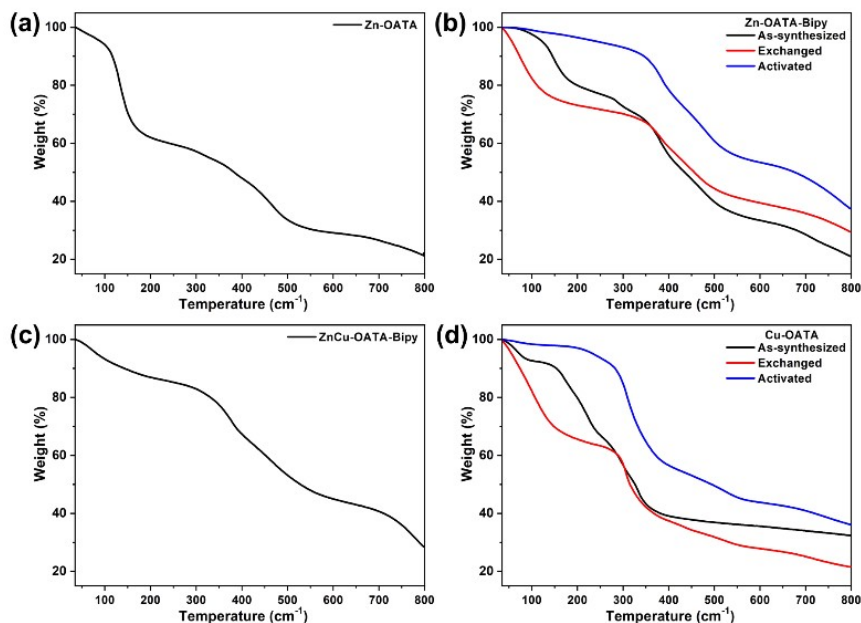

**Figure S8.** TGA curves for (a) Zn-OATA, (b) Zn-OATA-Bipy, (c) ZnCu-OATA-Bipy, and (d) Cu-OATA.

## 6. Calculation of sorption heat using Virial 2 model

$$\ln P = \ln N + 1/T \sum_{i=0}^m a_i N^i + \sum_{i=0}^n b_i N^i \quad Q_{st} = -R \sum_{i=0}^m a_i N^i$$

The above virial expression was used to fit the combined isotherm data (measured at 273 and 298 K), where  $P$  is the pressure,  $N$  is the adsorbed amount,  $T$  is the temperature,  $a_i$  and  $b_i$  are virial coefficients, and  $m$  and  $n$  are the number of coefficients used to describe the isotherms.  $Q_{st}$  is the coverage-dependent enthalpy of adsorption and  $R$  is the universal gas constant.

**Table S3.** Fitting parameters of the adsorption heats for Zn-OATA-Bipy.

|                  | C <sub>3</sub> H <sub>6</sub> | C <sub>2</sub> H <sub>4</sub> | C <sub>3</sub> H <sub>8</sub> | C <sub>2</sub> H <sub>6</sub> | CH <sub>4</sub> |
|------------------|-------------------------------|-------------------------------|-------------------------------|-------------------------------|-----------------|
| a0               | -4493.31818                   | -3428.69342                   | -4269.6955                    | -3409.58636                   | -2252.24369     |
| a1               | -19.35683                     | -7.30804                      | -19.68291                     | -9.63865                      | -3.03345        |
| a2               | -0.0053                       | 0.22919                       | 0.00473                       | 0.34768                       | 27.86805        |
| a3               | 8.27951E-5                    | -0.00333                      | 8.98611E-5                    | -0.00412                      | -3.05959        |
| a4               | 3.6995E-8                     | 1.677E-5                      | 3.00345E-8                    | 1.67157E-5                    | 0.11049         |
| b0               | 13.89103                      | 13.50398                      | 13.38634                      | 13.09105                      | 12.38592        |
| b1               | 0.06958                       | 0.01571                       | 0.06549                       | 0.00491                       | -0.30351        |
| R <sup>2</sup>   | 0.99857                       | 0.99867                       | 0.99916                       | 0.99032                       | 0.99629         |
| Chi <sup>2</sup> | 0.00504                       | 0.00421                       | 0.00404                       | 0.03042                       | 0.00969         |

**Table S4.** Fitting parameters of the adsorption heats for Cu-OATA.

|                  | C <sub>3</sub> H <sub>6</sub> | C <sub>2</sub> H <sub>4</sub> | C <sub>3</sub> H <sub>8</sub> | C <sub>2</sub> H <sub>6</sub> | CH <sub>4</sub> |
|------------------|-------------------------------|-------------------------------|-------------------------------|-------------------------------|-----------------|
| a0               | -4622.94516                   | -4049.93224                   | -4581.80228                   | -<br>3939.11189               | -2406.76031     |
| a1               | -11.48153                     | 8.00776                       | -11.97857                     | 14.60514                      | 12.30092        |
| a2               | -0.02917                      | -0.1051                       | -0.03087                      | -0.03855                      | 0.79196         |
| a3               | 6.71355E-5                    | 7.04471E-4                    | 1.19417E-4                    | 1.48593E-4                    | -0.0777         |
| a4               | -9.7087E-9                    | -1.63657E-6                   | -7.58029E-8                   | 1.78643E-7                    | 0.00224         |
| b0               | 12.80082                      | 13.59438                      | 14.41469                      | 14.58559                      | 12.37599        |
| b1               | 0.0617                        | 0.00818                       | 0.05016                       | -0.03588                      | -0.0382         |
| R <sup>2</sup>   | 0.99787                       | 0.99997                       | 0.99819                       | 0.99967                       | 0.99996         |
| Chi <sup>2</sup> | 0.00504                       | 0.00421                       | 0.00404                       | 0.03042                       | 0.00969         |

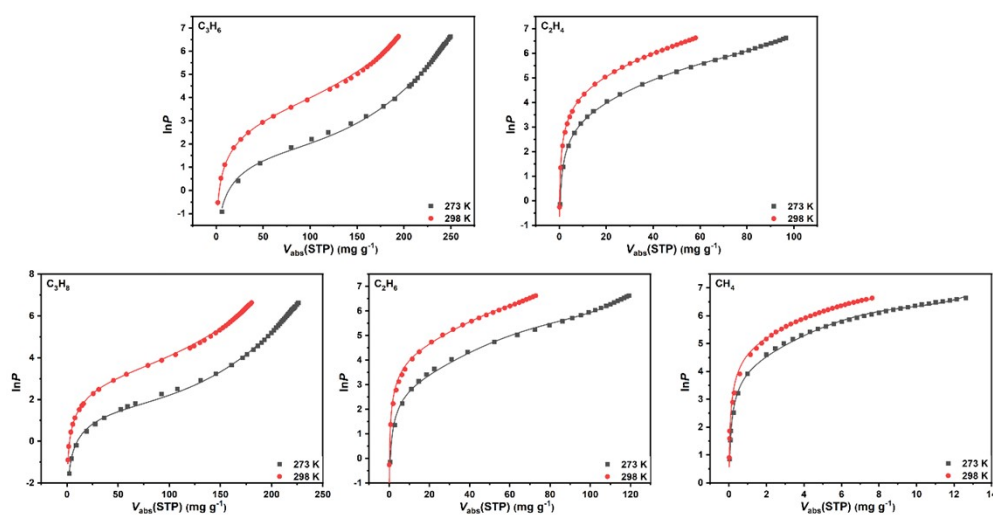

**Figure S9.** Adsorption isotherms of Zn-OATA-Bipy fitted by Virial 2 model.

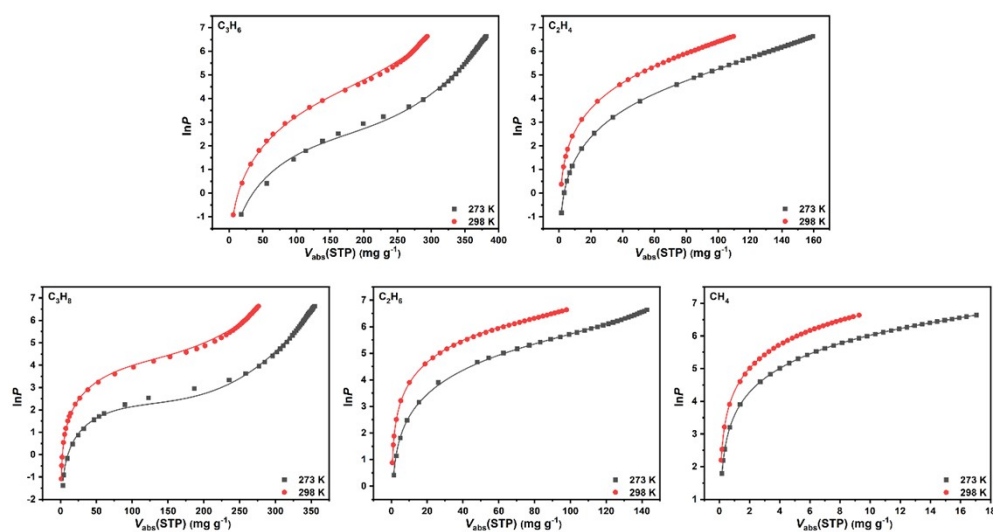

**Figure S10.** Adsorption isotherms of Cu-OATA fitted by Virial 2 model.

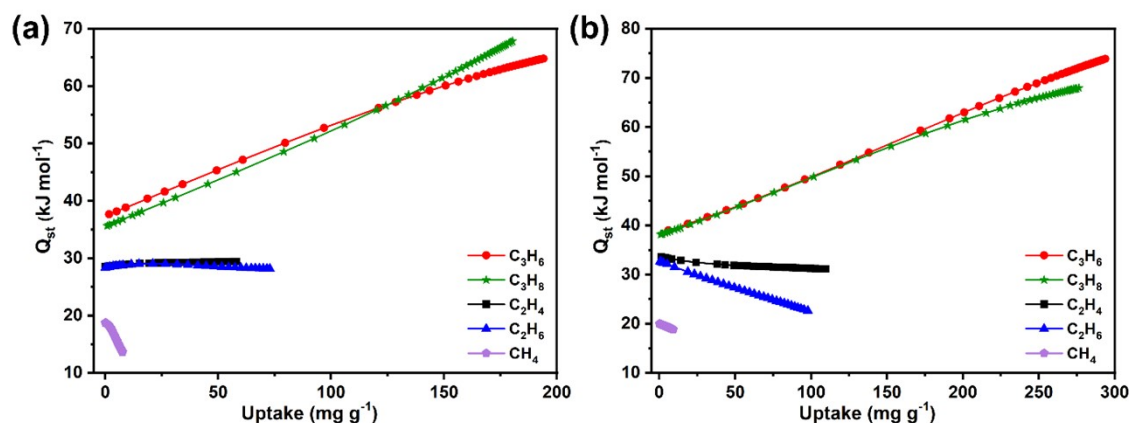

**Figure S11.** Adsorption heats of the gases.

## 7. IAST adsorption selectivity calculation

The experimental isotherm data for pure gases (measured at 273 and 298 K) was fitted using a single Langmuir-Freundlich (L-F) model:

$$q = \frac{a_1 * b_1 * P^{c_1}}{1 + b_1 * P^{c_1}}$$

Where  $q$  and  $p$  are the adsorbed amounts and the pressure of component  $i$ , respectively.

The adsorption selectivity for binary mixtures defined by

$$S_{i/j} = \frac{x_i * y_j}{x_j * y_i}$$

was calculated using the Ideal Adsorption Solution Theory (IAST) of Myers and Prausnitz. Where  $x_i$  is the mole fraction of component  $i$  in the adsorbed phase and  $y_i$  is the mole fraction of component  $i$  in the bulk.

**Table S5.** Fitting parameters of C<sub>3</sub>H<sub>6</sub>/C<sub>2</sub>H<sub>4</sub> selectivity for Zn-OATA-Bipy at 273/298 K.

|                | 273 K                         |                               | 298 K                         |                               |
|----------------|-------------------------------|-------------------------------|-------------------------------|-------------------------------|
|                | C <sub>3</sub> H <sub>6</sub> | C <sub>2</sub> H <sub>4</sub> | C <sub>3</sub> H <sub>6</sub> | C <sub>2</sub> H <sub>4</sub> |
| A1             | 5.98352                       | 5.05629                       | 4.88851                       | 4.17689                       |
| b1             | 0.55577                       | 0.02246                       | 0.12717                       | 0.00977                       |
| c1             | 0.87673                       | 0.9916                        | 1.02103                       | 1.00182                       |
| R <sup>2</sup> | 0.99676                       | 0.99996                       | 0.99966                       | 1                             |

Chi<sup>2</sup> 0.00829 5.61741E-5 7.89241E-4 1.63424E-6

**Table S6.** Fitting parameters of C<sub>3</sub>H<sub>6</sub>/C<sub>2</sub>H<sub>4</sub> selectivity for Cu-OATA at 273/298 K.

|                  | 273 K                         |                               | 298 K                         |                               |
|------------------|-------------------------------|-------------------------------|-------------------------------|-------------------------------|
|                  | C <sub>3</sub> H <sub>6</sub> | C <sub>2</sub> H <sub>4</sub> | C <sub>3</sub> H <sub>6</sub> | C <sub>2</sub> H <sub>4</sub> |
| A1               | 9.38215                       | 8.8593                        | 7.93612                       | 7.83922                       |
| b1               | 0.49889                       | 0.06689                       | 0.15652                       | 0.02939                       |
| c1               | 0.82047                       | 0.71295                       | 0.84039                       | 0.76249                       |
| R <sup>2</sup>   | 0.99862                       | 0.99997                       | 0.99889                       | 0.99998                       |
| Chi <sup>2</sup> | 0.00795                       | 1.26301E-4                    | 0.00573                       | 3.15536E-5                    |

**Table S7.** Fitting parameters of C<sub>3</sub>H<sub>8</sub>/C<sub>2</sub>H<sub>6</sub>/CH<sub>4</sub> selectivity for Zn-OATA-Bipy at 273/298 K.

|                  | 273 K                         |                               |                 | 298 K                         |                               |                 |
|------------------|-------------------------------|-------------------------------|-----------------|-------------------------------|-------------------------------|-----------------|
|                  | C <sub>3</sub> H <sub>8</sub> | C <sub>2</sub> H <sub>6</sub> | CH <sub>4</sub> | C <sub>3</sub> H <sub>8</sub> | C <sub>2</sub> H <sub>6</sub> | CH <sub>4</sub> |
| A1               | 5.12575                       | 3.71688                       | 6.5668          | 4.27171                       | 3.37411                       | 3.01235         |
| b1               | 0.51453                       | 0.03205                       | 0.00165         | 0.12908                       | 0.01251                       | 0.00186         |
| c1               | 0.9281                        | 1.04757                       | 0.95886         | 1.04931                       | 1.02965                       | 0.99827         |
| R <sup>2</sup>   | 0.99687                       | 0.99991                       | 0.99995         | 0.9993                        | 0.99996                       | 0.99994         |
| Chi <sup>2</sup> | 0.00909                       | 1.05484E-4                    | 3.15843E-6      | 0.00157                       | 2.1342E-5                     | 1.38876E-6      |

**Table S8.** Fitting parameters of C<sub>3</sub>H<sub>8</sub>/C<sub>2</sub>H<sub>6</sub>/CH<sub>4</sub> selectivity for Cu-OATA at 273/298 K.

|                  | 273 K                         |                               |                 | 298 K                         |                               |                 |
|------------------|-------------------------------|-------------------------------|-----------------|-------------------------------|-------------------------------|-----------------|
|                  | C <sub>3</sub> H <sub>8</sub> | C <sub>2</sub> H <sub>6</sub> | CH <sub>4</sub> | C <sub>3</sub> H <sub>8</sub> | C <sub>2</sub> H <sub>6</sub> | CH <sub>4</sub> |
| A1               | 7.89815                       | 7.63679                       | 7.49583         | 6.44607                       | 8.2071                        | 7.93184         |
| b1               | 0.3041                        | 0.01994                       | 0.00189         | 0.04575                       | 0.00278                       | 8.67894E-4      |
| c1               | 1.28579                       | 1.05782                       | 0.96799         | 1.36972                       | 1.18733                       | 0.97628         |
| R <sup>2</sup>   | 0.99695                       | 0.99932                       | 1               | 0.99932                       | 0.99981                       | 0.99999         |
| Chi <sup>2</sup> | 0.02555                       | 0.0022                        | 3.1822E-7       | 0.00421                       | 2.33474E-4                    | 2.22759E-7      |

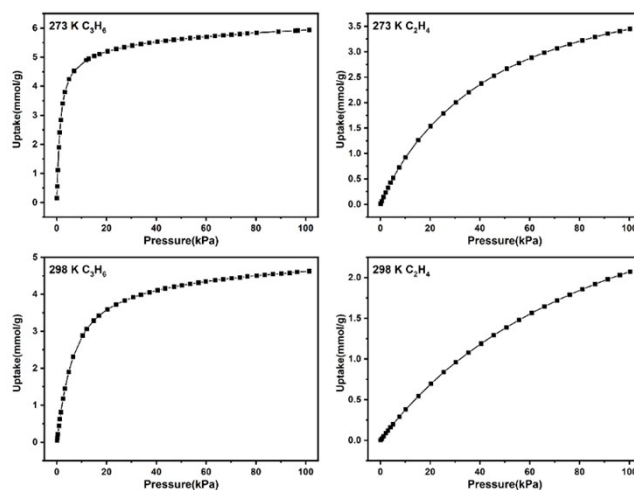

Figure S12.  $C_3H_6$  and  $C_2H_4$  adsorption isotherms fitting for Zn-OATA-Bipy at 273/298 K.

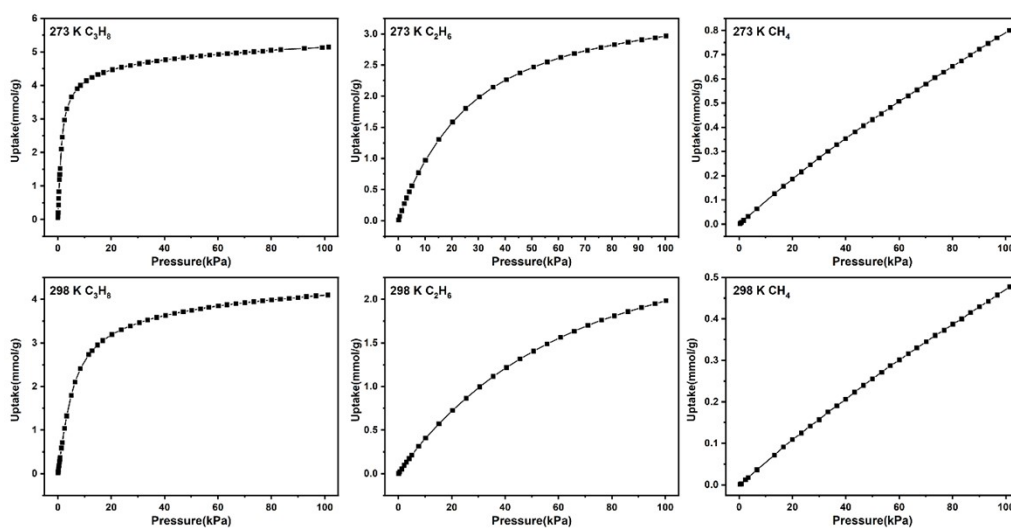

Figure S13.  $C_3H_8$ ,  $C_2H_6$  and  $CH_4$  adsorption isotherms fitting for Zn-OATA-Bipy at 273/298 K.

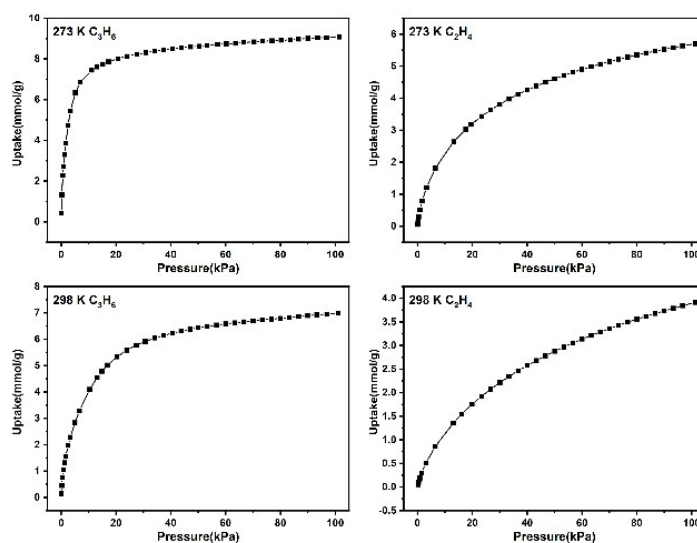

**Figure S14.** C<sub>3</sub>H<sub>6</sub> and C<sub>2</sub>H<sub>4</sub> adsorption isotherms fitting for Cu-OATA at 273/298 K.

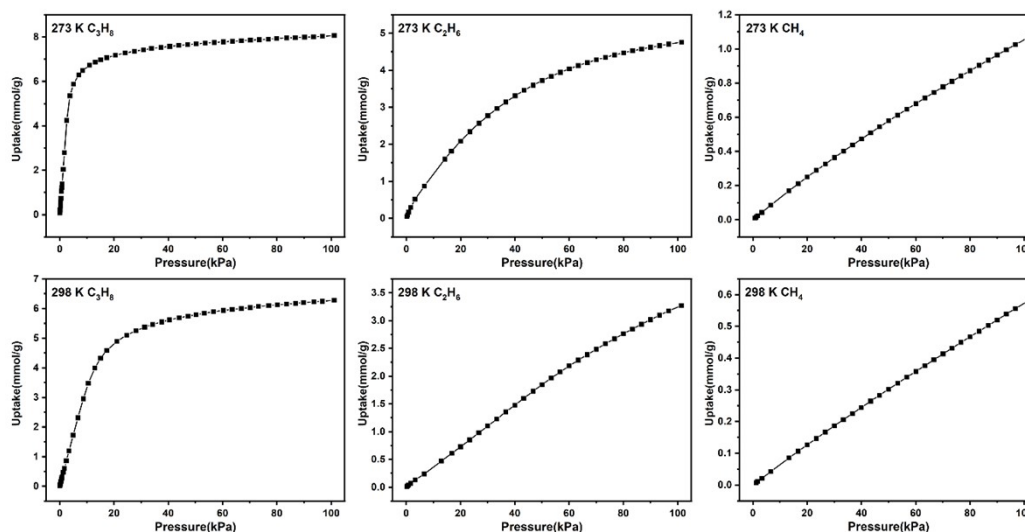

**Figure S15.** C<sub>3</sub>H<sub>8</sub>, C<sub>2</sub>H<sub>6</sub> and CH<sub>4</sub> adsorption isotherms fitting for Cu-OATA at 273/298 K.

**Table S9.** Adsorption capacity and selectivity of C<sub>3</sub>H<sub>6</sub>/C<sub>2</sub>H<sub>4</sub> at 1 atm and 298 K for the molar ratio at 50:50 binary mixtures of the promising MOFs

|                                 | C <sub>3</sub> H <sub>6</sub> Uptake<br>(cm <sup>3</sup> g <sup>-1</sup> ) | C <sub>2</sub> H <sub>4</sub> Uptake<br>(cm <sup>3</sup> g <sup>-1</sup> ) | IAST Selectivity | Ref.             |
|---------------------------------|----------------------------------------------------------------------------|----------------------------------------------------------------------------|------------------|------------------|
| <b>Zn-OATA-Bipy</b>             | <b>113.3</b>                                                               | <b>50.8</b>                                                                | <b>19.8</b>      | <b>This work</b> |
| <b>Cu-OATA</b>                  | <b>171.4</b>                                                               | <b>95.9</b>                                                                | <b>10.8</b>      | <b>This work</b> |
| LIFM-WZ-3                       | 44                                                                         | 32                                                                         | 10.7             | 2                |
| ANPC-2-700                      | 203.4                                                                      | 105.1                                                                      | 9.8              | 3                |
| NEM-7-Cu                        | 75.5                                                                       | 29                                                                         | 8.6              | 4                |
| MFM-202a                        | 160.8                                                                      | 64.96                                                                      | 8.4              | 5                |
| spe-MOF                         | 236.9                                                                      | 21.4                                                                       | 7.7              | 6                |
| iso-MOF-4                       | 254.5                                                                      | 73.1                                                                       | 7.7              | 7                |
| NEM-4                           | 197.4                                                                      | 164.1                                                                      | 6.8              | 8                |
| HKUST-1                         | 137.4                                                                      | 102.14                                                                     | 5.8              | 9                |
| UPC-33                          | 94.3                                                                       | 31.1                                                                       | 5.7              | 10               |
| iso-MOF-1                       | 209                                                                        | 71.4                                                                       | 5.1              | 7                |
| (Cr)-MIL-101-SO <sub>3</sub> Ag | 105.84                                                                     | 63.95                                                                      | 4.8              | 11               |
| Zn-BPZ-SA                       | 68.3                                                                       | 63.9                                                                       | 4.8              | 12               |
| Mg-MOF-74                       | 149.98                                                                     | 161.28                                                                     | 4.7              | 13               |
| PCP-1                           | 70.7                                                                       | 56.67                                                                      | 3.6              | 14               |

**Table S10.** Adsorption capacity and selectivity of C<sub>3</sub>H<sub>8</sub>/C<sub>2</sub>H<sub>6</sub>/CH<sub>4</sub> at 1 atm and 298 K for the molar ratio at 50:50 binary mixtures of the promising MOFs

|                     | C <sub>3</sub> H <sub>8</sub><br>Uptake<br>(cm <sup>3</sup> g <sup>-1</sup> ) | C <sub>2</sub> H <sub>6</sub><br>Uptake<br>(cm <sup>3</sup> g <sup>-1</sup> ) | CH <sub>4</sub> Uptake<br>(cm <sup>3</sup> g <sup>-1</sup> ) | C <sub>3</sub> H <sub>8</sub> /C <sub>2</sub> H <sub>6</sub><br>Selectivity | C <sub>3</sub> H <sub>8</sub> /CH <sub>4</sub><br>Selectivity | C <sub>2</sub> H <sub>6</sub> /CH <sub>4</sub><br>Selectivity | Ref.             |
|---------------------|-------------------------------------------------------------------------------|-------------------------------------------------------------------------------|--------------------------------------------------------------|-----------------------------------------------------------------------------|---------------------------------------------------------------|---------------------------------------------------------------|------------------|
| SNNU-Bai68          | 77                                                                            | 69                                                                            | 23.4                                                         | 9.2                                                                         | 232.3                                                         | 22.4                                                          | 15               |
| SNNU-Bai69          | 55                                                                            | 43                                                                            | 7                                                            | 6.8                                                                         | 214.4                                                         | 25.3                                                          | 16               |
| <b>Zn-OATA-Bipy</b> | <b>100.4</b>                                                                  | <b>48.6</b>                                                                   | <b>11.7</b>                                                  | <b>18.4</b>                                                                 | <b>195.7</b>                                                  | <b>8.5</b>                                                    | <b>This work</b> |
| CTGU-15             | 297.2                                                                         | 52.2                                                                          | 9.8                                                          | 5.2                                                                         | 170.2                                                         | 5.2                                                           | 17               |
| NEM-4               | 196.1                                                                         | 172.2                                                                         | 19.3                                                         | 6.2                                                                         | 168.3                                                         | 20.1                                                          | 8                |
| MOF-801             | 74                                                                            | 55.4                                                                          | 12.8                                                         | 11.8                                                                        | 136.8                                                         | 22                                                            | 18               |
| UPC-98              | 97.4                                                                          | 45.4                                                                          | 5.9                                                          | 5.9                                                                         | 124.6                                                         | 13.6                                                          | 19               |
| A-AC-4              | 288.1                                                                         | 161.4                                                                         | 28.9                                                         | 5.1                                                                         | 108.4                                                         | 15.6                                                          | 20               |
| In/Tb-CBDA          | 61                                                                            | 50                                                                            | 8                                                            | 6.7                                                                         | 105                                                           | 12                                                            | 21               |
| UPC-35              | 111.3                                                                         | 40.9                                                                          | 4.8                                                          | 5.6                                                                         | 97.7                                                          | 11.6                                                          | 22               |
| InOF-1              | 104.1                                                                         | 101.4                                                                         | 17.2                                                         | 4.9                                                                         | 90                                                            | 17                                                            | 23               |
| A-AC-3              | 277.8                                                                         | 173.7                                                                         | 33.8                                                         | 4.3                                                                         | 89.5                                                          | 16.7                                                          | 20               |
| <b>Cu-OATA</b>      | <b>153.9</b>                                                                  | <b>80.1</b>                                                                   | <b>14.2</b>                                                  | <b>9.1</b>                                                                  | <b>82.8</b>                                                   | <b>8.4</b>                                                    | <b>This work</b> |
| UPC-104             | 232.8                                                                         | 133.8                                                                         | 18.1                                                         | 5.0                                                                         | 79                                                            | 12.3                                                          | 24               |

## 8. Grand canonical Monte Carlo (GCMC) simulations

Grand canonical Monte Carlo (GCMC) simulations were performed for the gas adsorption in the framework by the Sorption module of Material Studio (Accelrys. Materials Studio Getting Started). The partial charges for atoms of the framework were derived from QEq method and QEq neutral 1.0 parameter. One unit cell was used during the simulations. The interaction energies between the gas molecules and framework were computed through the Coulomb and Lennard-Jones 6-12 (LJ) potentials. All parameters for the atoms were modeled with the universal force field (UFF) embedded in the MS modeling package. A cutoff distance of 12.5 Å was used for LJ interactions, and the Coulombic interactions were calculated by using Ewald summation. For each run, the 3×10<sup>6</sup> maximum loading steps, 3×10<sup>6</sup> production steps were employed.

## 9. Breakthrough experiments

The breakthrough experiment was performed on the Quantachrome dynaSorb BT equipment at 298 K and 1 atm (Ar as the carrier gas). The activated Zn-OATA-Bipy/Cu-OATA was filled into a packed column of  $\phi$  4.2×80 mm, and then the



packed column was washed with Ar at 343 K for 60 minutes to further activate the samples. Between two breakthrough experiments, the adsorbent was regenerated by Ar flow of 8 mL min<sup>-1</sup> for 35 min at 353 K to guarantee a complete removal of the adsorbed gases.

**Table S11.** Breakthrough experiment for olefin at different test conditions.

| C <sub>3</sub> H <sub>6</sub> /C <sub>2</sub> H <sub>4</sub><br>(v/v) | Flow rate<br>(mL min <sup>-1</sup> ) | C <sub>2</sub> H <sub>4</sub>               | C <sub>3</sub> H <sub>6</sub>               | Δt<br>(min g <sup>-1</sup> ) | C <sub>2</sub> H <sub>4</sub>                              | C <sub>3</sub> H <sub>6</sub>                              | C <sub>2</sub> H <sub>4</sub><br>Purity<br>(≥ %) | C <sub>3</sub> H <sub>6</sub><br>Purity<br>(≥ %) |
|-----------------------------------------------------------------------|--------------------------------------|---------------------------------------------|---------------------------------------------|------------------------------|------------------------------------------------------------|------------------------------------------------------------|--------------------------------------------------|--------------------------------------------------|
|                                                                       |                                      | Retention<br>time<br>(min g <sup>-1</sup> ) | Retention<br>time<br>(min g <sup>-1</sup> ) |                              | Collection<br>volume<br>(cm <sup>3</sup> g <sup>-1</sup> ) | Collection<br>volume<br>(cm <sup>3</sup> g <sup>-1</sup> ) |                                                  |                                                  |
| <b>Zn-OATA-Bipy</b>                                                   |                                      |                                             |                                             |                              |                                                            |                                                            |                                                  |                                                  |
| 20/20                                                                 | 8                                    | 1.2                                         | 20.3                                        | 19.1                         | 32.7                                                       | -                                                          | 99.5                                             | -                                                |
| 10/30                                                                 | 8                                    | 1.7                                         | 32.8                                        | 31.1                         | 48.6                                                       | 25.5                                                       | 99.9                                             | 92                                               |
| <b>Cu-OATA</b>                                                        |                                      |                                             |                                             |                              |                                                            |                                                            |                                                  |                                                  |
| 20/20                                                                 | 8                                    | 13.2                                        | 47.6                                        | 33.4                         | 87.1                                                       | -                                                          | 99.9                                             | -                                                |
| 10/30                                                                 | 8                                    | 13.5                                        | 71.8                                        | 58.3                         | 168.4                                                      | 50.3                                                       | 99.95                                            | 97                                               |

**Table S12.** Breakthrough of some benchmark materials for olefin at 298 K.

|                                                | Flow rate<br>(mL min <sup>-1</sup> ) | Mixture composition and<br>proportion<br>(v/v)                              | C <sub>3</sub> H <sub>6</sub> /C <sub>2</sub> H <sub>4</sub>       | Ref.        |
|------------------------------------------------|--------------------------------------|-----------------------------------------------------------------------------|--------------------------------------------------------------------|-------------|
|                                                |                                      |                                                                             | Approximate retention<br>time difference<br>(min g <sup>-1</sup> ) |             |
| <b>Cu-OATA</b>                                 | <b>8</b>                             | <b>C<sub>2</sub>H<sub>4</sub>/C<sub>3</sub>H<sub>6</sub>/Ar = 20/20/60</b>  | <b>33.4</b>                                                        | <b>This</b> |
|                                                | <b>8</b>                             | <b>C<sub>2</sub>H<sub>4</sub>/C<sub>3</sub>H<sub>6</sub>/Ar = 30/10/60</b>  | <b>58.3</b>                                                        | <b>work</b> |
| iso-MOF-4                                      | 2.67                                 | C <sub>2</sub> H <sub>4</sub> /C <sub>3</sub> H <sub>6</sub> = 50/50        | 95                                                                 | 7           |
| spe-MOF                                        | 2                                    | C <sub>2</sub> H <sub>4</sub> /C <sub>3</sub> H <sub>6</sub> = 50/50        | 67                                                                 | 6           |
|                                                | 4                                    | C <sub>2</sub> H <sub>4</sub> /C <sub>3</sub> H <sub>6</sub> = 50/20        | 37                                                                 |             |
| [Zn <sub>2</sub> (oba) <sub>2</sub> (dmimpym)] | 6                                    | C <sub>2</sub> H <sub>4</sub> /C <sub>3</sub> H <sub>6</sub> /Ar = 5/5/90   | 120                                                                | 25          |
|                                                | 6                                    | C <sub>2</sub> H <sub>4</sub> /C <sub>3</sub> H <sub>6</sub> /Ar = 5/2/93   | 165                                                                |             |
| CR-COF-2                                       | 1                                    | C <sub>2</sub> H <sub>4</sub> /C <sub>3</sub> H <sub>6</sub> = 50/50        | 35                                                                 | 26          |
|                                                | 2                                    | C <sub>2</sub> H <sub>4</sub> /C <sub>3</sub> H <sub>6</sub> = 50/20        | 37                                                                 |             |
| Mn-dtzip                                       | 8                                    | C <sub>2</sub> H <sub>4</sub> /C <sub>3</sub> H <sub>6</sub> /Ar = 20/20/60 | 12                                                                 | 27          |
|                                                | 7                                    | C <sub>2</sub> H <sub>4</sub> /C <sub>3</sub> H <sub>6</sub> /Ar = 25/10/65 | 25                                                                 |             |
| <b>Zn-OATA-Bipy</b>                            | <b>8</b>                             | <b>C<sub>2</sub>H<sub>4</sub>/C<sub>3</sub>H<sub>6</sub>/Ar = 20/20/60</b>  | <b>19.1</b>                                                        | <b>This</b> |
|                                                | <b>8</b>                             | <b>C<sub>2</sub>H<sub>4</sub>/C<sub>3</sub>H<sub>6</sub>/Ar = 30/10/60</b>  | <b>31.1</b>                                                        | <b>work</b> |
| Zn-BPZ-SA                                      | 5                                    | C <sub>2</sub> H <sub>4</sub> /C <sub>3</sub> H <sub>6</sub> /Ar = 5/5/90   | 124                                                                | 12          |
|                                                | 5                                    | C <sub>2</sub> H <sub>4</sub> /C <sub>3</sub> H <sub>6</sub> /Ar = 5/2/93   | 153                                                                |             |

**Table S13.** Breakthrough experiment for paraffin at different test conditions.

| $C_3H_8/C_2H_6/CH_4$<br>4<br>(v/v/v) | Flow rate<br>(mL min <sup>-1</sup> ) | $\Delta t C_3H_8-C_2H_6$<br>(min g <sup>-1</sup> ) | $\Delta t C_3H_8-CH_4$<br>(min g <sup>-1</sup> ) | $\Delta t C_2H_6-CH_4$<br>(min g <sup>-1</sup> ) | CH <sub>4</sub><br>Collection<br>volume<br>(cm <sup>3</sup> g <sup>-1</sup> ) | C <sub>2</sub> H <sub>6</sub><br>Collection<br>volume<br>(cm <sup>3</sup> g <sup>-1</sup> ) | C <sub>3</sub> H <sub>8</sub><br>Collection<br>volume<br>(cm <sup>3</sup> g <sup>-1</sup> ) |
|--------------------------------------|--------------------------------------|----------------------------------------------------|--------------------------------------------------|--------------------------------------------------|-------------------------------------------------------------------------------|---------------------------------------------------------------------------------------------|---------------------------------------------------------------------------------------------|
| <b>Zn-OATA-Bipy</b>                  |                                      |                                                    |                                                  |                                                  |                                                                               |                                                                                             |                                                                                             |
| 20/20/0                              | 8                                    | 11.9                                               | -                                                | -                                                | -                                                                             | 18.3                                                                                        | -                                                                                           |
| 0/4/34                               | 13                                   | -                                                  | -                                                | 1.8                                              | 6.2                                                                           | -                                                                                           | -                                                                                           |
| 2/4/34                               | 13                                   | 21.8                                               | 24.1                                             | 2.3                                              | 8.5                                                                           | -                                                                                           | 9.1                                                                                         |
| <b>Cu-OATA</b>                       |                                      |                                                    |                                                  |                                                  |                                                                               |                                                                                             |                                                                                             |
| 20/20/0                              | 8                                    | 32.2                                               | -                                                | -                                                | -                                                                             | 68.2                                                                                        | 61.3                                                                                        |
| 0/4/34                               | 13                                   | -                                                  | -                                                | 6.8                                              | 31.9                                                                          | -                                                                                           | -                                                                                           |
| 2/4/34                               | 13                                   | 49.2                                               | 56.1                                             | 6.9                                              | 32.3                                                                          | -                                                                                           | 13.3                                                                                        |

**Table S14.** Breakthrough of some benchmark materials for  $C_3H_8/C_2H_6/CH_4 = 5/10/85$ .

|                     | Flow rate<br>(mL min <sup>-1</sup> ) | $\Delta t C_3H_8-C_2H_6$<br>(min g <sup>-1</sup> ) | $\Delta t C_3H_8-CH_4$<br>(min g <sup>-1</sup> ) | $\Delta t C_2H_6-CH_4$<br>(min g <sup>-1</sup> ) | C <sub>3</sub> H <sub>8</sub><br>Approximate<br>Collection<br>volume<br>(cm <sup>3</sup> g <sup>-1</sup> ) | CH <sub>4</sub><br>Approximate<br>Collection<br>volume<br>(cm <sup>3</sup> g <sup>-1</sup> ) | Ref.             |
|---------------------|--------------------------------------|----------------------------------------------------|--------------------------------------------------|--------------------------------------------------|------------------------------------------------------------------------------------------------------------|----------------------------------------------------------------------------------------------|------------------|
| Ni(HBTC)(Bipy)      | 5                                    | 56                                                 | 76                                               | 20                                               | -                                                                                                          | 85                                                                                           | 28               |
| BSF-2               | 4                                    | 52                                                 | 67                                               | 15                                               | -                                                                                                          | 51                                                                                           | 29               |
| <b>Cu-OATA</b>      | <b>13</b>                            | <b>49.2</b>                                        | <b>56.1</b>                                      | <b>6.9</b>                                       | <b>13.3</b>                                                                                                | <b>32.3</b>                                                                                  | <b>This work</b> |
| LIFM-ZZ-1           | 3                                    | 42                                                 | 63                                               | 21                                               | -                                                                                                          | 53.6                                                                                         | 30               |
| BSF-3               | 10                                   | 37                                                 | 58                                               | 21                                               | -                                                                                                          | 178.5                                                                                        | 31               |
| SNNU-Bai69          | 10                                   | 25.3                                               | 35.5                                             | 10.2                                             | -                                                                                                          | 86.7                                                                                         | 16               |
| SNNU-Bai68          | 10                                   | 24                                                 | 35                                               | 11                                               | -                                                                                                          | 93.5                                                                                         | 15               |
| MOF-801             | 10                                   | 22                                                 | 27.2                                             | 5.2                                              | -                                                                                                          | 44.2                                                                                         | 18               |
| <b>Zn-OATA-Bipy</b> | <b>13</b>                            | <b>21.8</b>                                        | <b>24.1</b>                                      | <b>2.3</b>                                       | <b>9.1</b>                                                                                                 | <b>8.5</b>                                                                                   | <b>This work</b> |
| A-AC-3              | 10                                   | 19.5                                               | 33                                               | 13.5                                             | -                                                                                                          | 114.8                                                                                        | 20               |
| MIL-142A            | 10                                   | 10                                                 | 12                                               | 2                                                | -                                                                                                          | 17                                                                                           | 32               |

## 10. References

- [1] Y. Guclu, H. Erer, H. Demiral, C. Altintas, S. Keskin, N. Tumanov, B. L. Su, F. Semerci, *ACS Appl. Mater. Interfaces* 2021, **13**, 33188-33198.
- [2] Z. Wang, J.-H. Zhang, J.-J. Jiang, H.-P. Wang, Z.-W. Wei, X. Zhu, M. Pan, C.-Y. Su, *J. Mater. Chem. A* 2018, **6**, 17698-17705.
- [3] P. Zhang, X. Wen, L. Wang, Y. Zhong, Y. Su, Y. Zhang, J. Wang, J. Yang, Z. Zeng, S. Deng, *Chem. Eng. J.* 2020, **381**, 122731.

- [4] X. Liu, C. Hao, J. Li, Y. Wang, Y. Hou, X. Li, L. Zhao, H. Zhu, W. Guo, *Inorg. Chem. Front.* 2018, **5**, 2898-2905.
- [5] S. Gao, C. G. Morris, Z. Lu, Y. Yan, H. G. W. Godfrey, C. Murray, C. C. Tang, K. M. Thomas, S. Yang, M. Schröder, *Chem. Mater.* 2016, **28**, 2331-2340.
- [6] H. Fang, B. Zheng, Z. H. Zhang, H. X. Li, D. X. Xue, J. Bai, *Angew. Chem. Int. Ed.* 2021, **60**, 16521-16528.
- [7] W. Fan, X. Wang, X. Zhang, X. Liu, Y. Wang, Z. Kang, F. Dai, B. Xu, R. Wang, D. Sun, *ACS Cent. Sci.* 2019, **5**, 1261-1268.
- [8] X. Liu, W. Fan, M. Zhang, G. Li, H. Liu, D. Sun, L. Zhao, H. Zhu, W. Guo, *Mater. Chem. Front.* 2018, **2**, 1146-1154.
- [9] W. Su, A. Zhang, Y. Sun, M. Ran, X. J. Wang, *Chem. Eng. Data* 2016, **62**, 417-421.
- [10] W. Fan, Y. Wang, Q. Zhang, A. Kirchon, Z. Xiao, L. Zhang, F. Dai, R. Wang, D. Sun, *Chem. Eur. J.* 2018, **24**, 2137-2143.
- [11] G. Chang, M. Huang, Y. Su, H. Xing, B. Su, Z. Zhang, Q. Yang, Y. Yang, Q. Ren, Z. Bao, B. Chen, *Chem. Commun.* 2015, **51**, 2859-2862.
- [12] G.-D. Wang, R. Krishna, Y.-Z. Li, Y.-Y. Ma, L. Hou, Y.-Y. Wang, *ACS Materials Lett.* 2023, **5**, 1091-1099.
- [13] X. Wu, Z. Bao, B. Yuan, J. Wang, Y. Sun, H. Luo, S. Deng, *Micropor. Mesopor. Mat.* 2013, **180**, 114-122.
- [14] D. Geng, M. Zhang, X. Hang, W. Xie, Y. Qin, Q. Li, Y. Bi, Z. Zheng, *Dalton Trans.* 2018, **47**, 9008-9013.
- [15] H. Cheng, Q. Wang, L. Meng, P. Sheng, Z. Zhang, M. Ding, Y. Gao, J. Bai, *ACS Appl Mater Interfaces* 2021, **13**, 40713-40723.
- [16] M. Ding, Q. Wang, H. Cheng, J. Bai, *CrystEngComm* 2022, **24**, 2388-2392.
- [17] D. Lv, Z. Liu, F. Xu, H. Wu, W. Yuan, J. Yan, H. Xi, X. Chen, Q. Xia, *Sep. Purif. Technol.* 2021, **266**, 118198.
- [18] H. Liu, B. Li, Y. Zhao, C. Kong, C. Zhou, Y. Lin, Z. Tian, L. Chen, *Chem. Commun.* 2021, **57**, 13008-13011.
- [19] X. Wang, X. Wang, X. Zhang, W. Fan, Q. Li, W. Jiang, F. Dai, D. Sun, *Cryst. Growth Des.* 2020, **20**, 5670-5675.
- [20] W. Liang, H. Xiao, D. Lv, J. Xiao, Z. Li, *Sep. Purif. Technol.* 2018, **190**, 60-67.
- [21] D. Wang, Z. Liu, L. Xu, C. Li, D. Zhao, G. Ge, Z. Wang, J. Lin, *Dalton Trans.* 2019, **48**, 278-284.
- [22] Y. Wang, W. Fan, X. Wang, Y. Han, L. Zhang, D. Liu, F. Dai, D. Sun, *Inorg. Chem. Front.* 2018, **5**, 2408-2412.
- [23] Y. Chen, Z. Qiao, D. Lv, H. Wu, R. Shi, Q. Xia, H. Wang, J. Zhou, Z. Li, *Ind. Eng. Chem. Res.* 2017, **56**, 4488-4495.
- [24] W. Fan, X. Liu, X. Wang, Y. Li, C. Xing, Y. Wang, W. Guo, L. Zhang, D. Sun, *Inorg. Chem. Front.* 2018, **5**, 2445-2449.
- [25] Y.-Z. Li, G.-D. Wang, R. Krishna, Q. Yin, D. Zhao, J. Qi, Y. Sui, L. Hou, *Chem. Eng. J.* 2023, **466**, 143056.
- [26] X. H. Han, K. Gong, X. Huang, J. W. Yang, X. Feng, J. Xie, B. Wang, *Angew. Chem. Int. Ed.* 2022, **61**, e202202912.

- [27] L. Zhang, L.-N. Ma, G.-D. Wang, L. Hou, Z. Zhu, Y.-Y. Wang, *J. Mater. Chem. A* 2023, **11**, 2343-2348.
- [28] P. Guo, M. Chang, T. Yan, Y. Li, D. Liu, *Chin. J Chem. Eng.* 2022, **42**, 10-16.
- [29] Y. Zhang, L. Yang, L. Wang, X. Cui, H. Xing, *J. Mater. Chem. A* 2019, **7**, 27560-27566.
- [30] Z. Zeng, W. Wang, X. Xiong, N. Zhu, Y. Xiong, Z. Wei, J. J. Jiang, *Inorg. Chem.* 2021, **60**, 8456-8460.
- [31] L. Wang, W. Sun, S. Duttwyler, Y. Zhang, *J Solid State Chem.* 2021, **299**, 122167.
- [32] Y. Yuan, H. Wu, Y. Xu, D. Lv, S. Tu, Y. Wu, Z. Li, Q. Xia, *Chem. Eng. J.* 2020, **395**, 125057.
